# Supplementary material for: Deep eutectic solvent assisted preparation of cellulose nanofibers and graphene composite films for supercapacitors
Source: Royal Society of Chemistry journal article supplement (doi:10.1039/d2su00107a), 2023-01-01
Supplement: d2su00107a1.pdf [file d2su00107a1.pdf]

Supplementary Information for:

## **Deep Eutectic Solvent Assisted Preparation of Cellulose Nanofibers and Graphene Composite Films for Supercapacitors**

Zhongzheng Ma<sup>a</sup>, Yi Duan<sup>a</sup>, Yongqi Deng<sup>a</sup>, Hongdong Quan<sup>b</sup>, Xiuguo Yang<sup>b</sup>,  
Hongyan Li<sup>b</sup>, Luqian Ye<sup>b</sup>, Bingxia Xu<sup>c</sup>, Lifeng Yan<sup>a,\*</sup>

<sup>a</sup>Department of Chemical Physics, University of Science and Technology of China,  
Jinzai road 96, Hefei, 230026, Anhui, China. E-mail: [lfyan@ustc.edu.cn](mailto:lfyan@ustc.edu.cn)

<sup>b</sup>Inner Mongolia Key Laboratory of Polyol Chemical New Material Enterprise, and  
Chifeng Ruiyang Chemical Co. Ltd, Pingzhuang, Ruiyang, 024076, Inner Mongolia,  
China.

<sup>c</sup>Key Laboratory of Anhui for Tobacco Chemistry, Hefei, 230088, Anhui, China

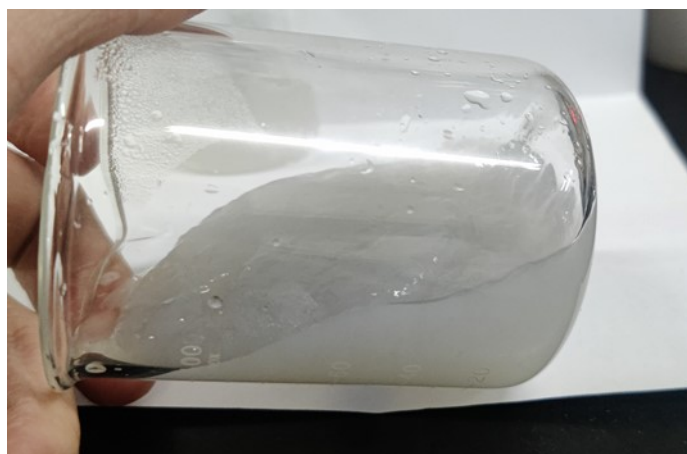

Figure S1. Photoimage of the as-prepared cellulose nanofibers

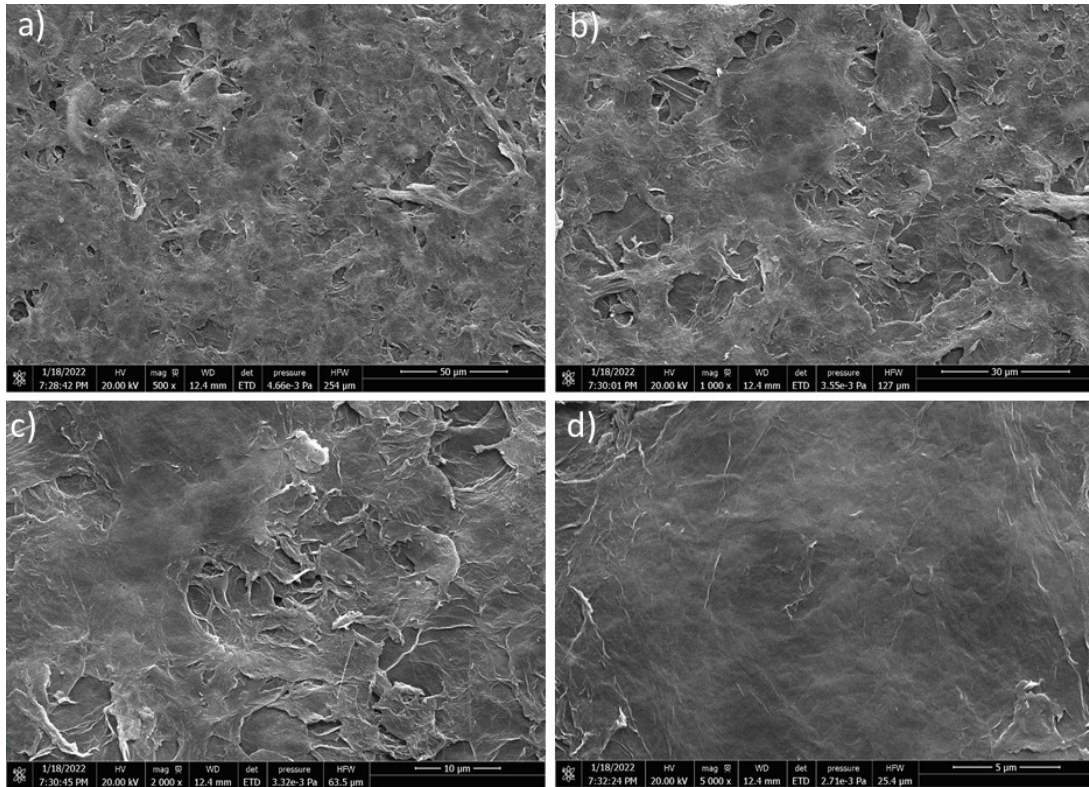

Figure S2. Homogeneous distribution of GO nanosheets in the CGF-2 film

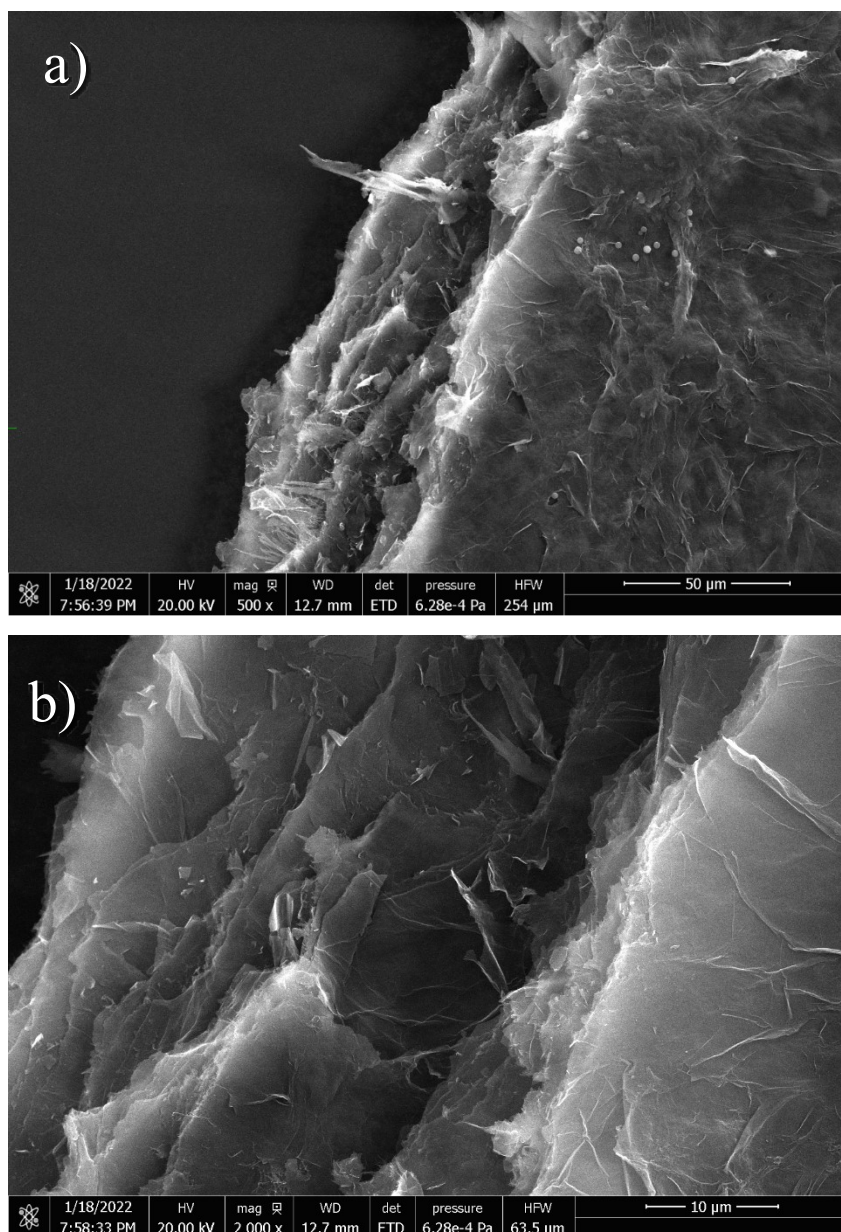

Figure S3. SEM cross-section image of the CGF-2 film at various resolution (a and b)
